# Supplementary material
Source: publisher figshare collection journal article supplement (https://rs.figshare.com/ndownloader/files/18107354)
Supplement: Supplementary file 1 [file 18107354]

## Sheet: Sheet1
ID	Placental Weight	iugr	mat_age	wt	egadays	LN(PW)	LN(WT)
460400	520	0	17	1405	206	6.25383	7.24779			y = 0.8568x + 2.0428
258328	350	0	19	515	169	5.85793	6.24417
507040	260	0	19	810	172	5.56068	6.69703
511778	290	0	26	545	165	5.66988	6.30079
549118	404	0	26	1750	215	6.00141	7.46737
551032	260	0	36	795	182	5.56068	6.67834
572979	274	0	19	790	189	5.61313	6.67203
575571	544	0	14	1720	214	6.29895	7.45008
290278	264	0	39	895	183	5.57595	6.79682
492466	280	0	20	615	161	5.63479	6.42162
563238	440	1	40	1100	219	6.08677	7.00307
495390	410	0	17	1960	207	6.01616	7.5807
545500	154	0		625	187	5.03695	6.43775
347909	190	1	36	850	212	5.24702	6.74524
334305	312	0	20	1830	223	5.743	7.51207
475139	230	0	30	720	173	5.43808	6.57925
485534	200	0	26	670	182	5.29832	6.50728
550911	258	0	21	1205	208	5.55296	7.09423
280027	434	0	32	1510	212	6.07304	7.31986
503608	430	0	22	1525	206	6.06379	7.32975
275711	190	0	33	600	200	5.24702	6.39693
533696	250	1	34	1100	224	5.52146	7.00307
402812	290	0	26	1450	220	5.66988	7.27932
559931	520	0	34	1505	206	6.25383	7.31655
285280	500	0	34	830	183	6.21461	6.72143
471407	360	0	38	1215	197	5.8861	7.1025
532800	206	1	33	630	185	5.32788	6.44572
449938	375	0		1385	204	5.92693	7.23346
488016	300	0	29	815	185	5.70378	6.70319
383049	340	0	34	1190	200	5.82895	7.08171
455241	370	0	39	1175	205	5.9135	7.06902
469059	250	0	20	1175	209	5.52146	7.06902
168561	350	0	36	1275	206	5.85793	7.1507
455439	320	0	21	805	186	5.76832	6.69084
544277	204	0	22	590	174	5.31812	6.38012
475501	390	0	23	775	188	5.96615	6.65286
482074	370	0		955	181	5.9135	6.86171
497705	300	0	22	1120	190	5.70378	7.02108
422965	450	0	29	1540	221	6.10925	7.33954
429850	430	0	27	1730	217	6.06379	7.45588
504811	360	0	22	860	192	5.8861	6.75693
443823	300	0	38	1245	206	5.70378	7.12689
431150	350	0	31	1195	211	5.85793	7.0859
484928	260	0	16	790	186	5.56068	6.67203
523223	348	0	25	1220	216	5.8522	7.10661
431876	290	0		920	192	5.66988	6.82437
519718	310	0	30	740	179	5.73657	6.60665
519105	250	0	17	665	173	5.52146	6.49979
500801	340	0	33	1360	214	5.82895	7.21524
93209	180	0	37	410	151	5.19296	6.01616
523162	290	0	31	1335	209	5.66988	7.19669
569987	338	0	23	1045	208	5.82305	6.95177
487805	400	0	23	1230	199	5.99146	7.11477
438246	420	0	25	710	172	6.04025	6.56526
548511	164	1		440	195	5.09987	6.08677
424620	320	0	36	1510	214	5.76832	7.31986
529599	945	0	19	2775	200	6.85118	7.92841
238573	181	0	30	1069	194	5.1985	6.97448
519100	270	0	32	1115	190	5.59842	7.01661
507533	245	0	24	1030	204	5.50126	6.93731
402823	400	0		1390	200	5.99146	7.23706
495493	270	0	28	915	175	5.59842	6.81892
230072	360	1	18	1460	217	5.8861	7.28619
455684	400	0	25	1255	217	5.99146	7.13489
99235	380	0	39	1135	194	5.94017	7.03439
465774	390	0	21	1845	217	5.96615	7.52023
449350	250	0	20	920	189	5.52146	6.82437
327539	314	0	33	900	186	5.74939	6.80239
497785	240	0	34	695	175	5.48064	6.54391
560453	338	0	23	1380	214	5.82305	7.22984
151301	450	0	25	1190	199	6.10925	7.08171
50475	310	0	27	980	177	5.73657	6.88755
376966	418	0		1570	213	6.03548	7.35883
510419	380	0	31	1255	198	5.94017	7.13489
432680	175	1	23	855	210	5.16479	6.7511
529789	360	0	31	1395	222	5.8861	7.24065
515363	440	0	37	1950	221	6.08677	7.57558
512374	360	0	31	1235	203	5.8861	7.11883
398058	470	0	18	1500	213	6.15273	7.31322
511146	310	0	35	1130	196	5.73657	7.02997
443137	300	1	28	1030	216	5.70378	6.93731
461205	220	0	25	665	173	5.39363	6.49979
430216	250	0	31	960	184	5.52146	6.86693
491885	380	0	38	1280	201	5.94017	7.15462
9778	370	0		1100	189	5.9135	7.00307
488875	220	0	29	605	172	5.39363	6.40523
348289	360	0	27	1680	215	5.8861	7.42655
277899	440	0	41	1425	189	6.08677	7.26193
469905	430	0	37	1375	209	6.06379	7.22621
500606	325	0	38	1150	214	5.78383	7.04752
574013	218	1	27	1060	222	5.3845	6.96602
547310	290	0	36	600	178	5.66988	6.39693
569337	315	0	35	1140	200	5.75257	7.03878
510828	455	0	32	1890	222	6.1203	7.54433
389336	320	0		980	195	5.76832	6.88755
479386	500	0	19	1940	223	6.21461	7.57044
556427	295	1	28	1055	209	5.68698	6.9613
281703	410	0	26	1105	191	6.01616	7.0076
423907	235	0	33	570	182	5.45959	6.34564
412940	300	0	23	735	182	5.70378	6.59987
451970	425	0	25	1590	220	6.05209	7.37149
557250	235	1	29	1000	213	5.45959	6.90776
535811	418	0	32	1575	213	6.03548	7.36201
247666	300	0		1405	209	5.70378	7.24779
	300	0		1345	207	5.70378	7.20415
567723	404	0	32	1485	211	6.00141	7.30317
441396	470	0	32	1495	210	6.15273	7.30988
530233	200	0	20	600	159	5.29832	6.39693
576024	244	0	28	915	194	5.49717	6.81892
505905	350	0	22	955	189	5.85793	6.86171
475200	320	0	20	1390	210	5.76832	7.23706
479354	320	0	22	800	190	5.76832	6.68461
526635	178	0		1300	192	5.18178	7.17012
515080	455	0	22	2275	221	6.1203	7.72974
527506	305	0	28	1500	218	5.72031	7.31322
38502	370	0	22	1415	217	5.9135	7.25488
548748	282	0	23	945	180	5.64191	6.85118
513350	390	0	17	1465	206	5.96615	7.28961
520887	246	0		775	173	5.50533	6.65286
478901	350	0	22	950	191	5.85793	6.85646
460818	300	0	20	820	184	5.70378	6.7093
564914	305	0	22	1000	189	5.72031	6.90776
515232	182	0	30	695	177	5.20401	6.54391
	285	0	32	765	178	5.65249	6.63988
530364	340	0	23	1810	223	5.82895	7.50108
560226	294	1	33	1175	218	5.68358	7.06902
494877	300	0	30	985	190	5.70378	6.89264
505200	330	0	27	1495	215	5.79909	7.30988
210293	416	1	23	1285	219	6.03069	7.15851
522702	465	0	31	1495	205	6.14204	7.30988
479056	191	0	30	605	172	5.25227	6.40523
471948	180	0	34	575	168	5.19296	6.35437
569301	180	0	17	585	170	5.19296	6.37161
464204	310	1	32	1135	222	5.73657	7.03439
535412	322	0	24	920	184	5.77455	6.82437
355578	370	0	23	615	168	5.9135	6.42162
389360	475	0	23	1880	223	6.16331	7.53903
540627	280	0	18	1655	212	5.63479	7.41156
453841	270	0		910	174	5.59842	6.81344
504812	200	1	21	885	201	5.29832	6.78559
449406	400	0	28	1180	199	5.99146	7.07327
440736	200	0	18	700	218	5.29832	6.55108
577113	436	1	27	1970	206	6.07764	7.58579
485060	162	0	36	560	187	5.0876	6.32794
459311	340	0	29	1285	206	5.82895	7.15851
550909	280	0	20	1055	197	5.63479	6.9613
423465	410	0	27	1360	194	6.01616	7.21524
449049	225	0	23	1075	211	5.4161	6.98008
448440	420	0	28	1030	190	6.04025	6.93731
441814	190	0	34	570	168	5.24702	6.34564
60424	320	0	20	1200	205	5.76832	7.09008
600854	378	0	30	1475	203	5.93489	7.29641
501811	530	0	23	1660	220	6.27288	7.41457
520983	265	0	29	775	190	5.57973	6.65286
493500	260	1	18	980	199	5.56068	6.88755
449259	400	0	32	1195	191	5.99146	7.0859
534734	308	1	21	1395	221	5.7301	7.24065
548116	490	0	1	1815	223	6.19441	7.50384
431093	530	0	30	1770	214	6.27288	7.47873
465029	390	1	35	1390	218	5.96615	7.23706
476917	300	0	39	1060	186	5.70378	6.96602
449163	200	0	33	720	176	5.29832	6.57925
541417	380	0	24	1420	213	5.94017	7.25841
534228	365	0	34	1220	196	5.8999	7.10661
488547	320	0	35	625	182	5.76832	6.43775
459644	250	0	35	590	208	5.52146	6.38012
437600	200	0	32	775	175	5.29832	6.65286
522475	355	0	28	1655	217	5.87212	7.41156
540478	350	0	13	1390	209	5.85793	7.23706
429042	295	0		900	193	5.68698	6.80239
532598	382	0	18	1485	217	5.94542	7.30317
485509	320	0	36	815	180	5.76832	6.70319
477008	370	0	38	1090	189	5.9135	6.99393
507403	340	0	28	1305	210	5.82895	7.17396
473809	410	0	23	1510	212	6.01616	7.31986
538611	225	0	24	800	172	5.4161	6.68461
470600	296	0	21	1200	210	5.69036	7.09008
	340	0	20	1375	220	5.82895	7.22621
359686	450	0	24	1430	210	6.10925	7.26543
	370	0	24	1520	224	5.9135	7.32647
228105	218	0	26	685	168	5.3845	6.52942
388853	435	0	32	1585	221	6.07535	7.36834
274673	390	0	26	1620	213	5.96615	7.39018
510557	320	0	32	1750	221	5.76832	7.46737
454413	300	0	29	1195	201	5.70378	7.0859
460341	380	0	26	1640	208	5.94017	7.40245
527305	360	0	17	1540	210	5.8861	7.33954
477944	320	0	35	865	186	5.76832	6.76273
475811	620	0		1710	219	6.42972	7.44425
480838	450	0	41	1490	214	6.10925	7.30653
436776	275	0	28	1280	206	5.61677	7.15462
471633	415	0	28	1390	203	6.02828	7.23706
555226	358	0	21	1410	201	5.88053	7.25134
511182	196	1	30	815	208	5.27811	6.70319
268479	160	1	34	585	206	5.07517	6.37161
54361	154	0	23	625	168	5.03695	6.43775
431108	280	0	25	585	175	5.63479	6.37161
501933	570	0	24	1965	223	6.34564	7.58325
382098	544	0	33	1080	208	6.29895	6.98472
525516	310	0	36	1550	207	5.73657	7.34601
433907	325	0	35	1190	198	5.78383	7.08171
554189	220	0	33	645	166	5.39363	6.46925
434667	388	0	37	1400	203	5.96101	7.24423
453697	286	0	29	815	196	5.65599	6.70319
441256	510	0	25	1405	201	6.23441	7.24779
407755	300	0	35	940	184	5.70378	6.84588
	334	0	34	915	178	5.81114	6.81892
542025	225	1	31	900	202	5.4161	6.80239
539271	448	0	27	965	196	6.10479	6.87213
531646	214	0	38	640	164	5.36598	6.46147
460048	360	0	29	1440	211	5.8861	7.2724
514714	330	0	31	1675	220	5.79909	7.42357
569425	520	0	27	1700	218	6.25383	7.43838
448718	300	0	31	900	177	5.70378	6.80239
480304	190	0	30	540	185	5.24702	6.29157
80746	190	0	40	650	169	5.24702	6.47697
485360	310	0	15	955	186	5.73657	6.86171
450020	320	0		1380	214	5.76832	7.22984
570104	250	0	18	740	180	5.52146	6.60665
384955	385	0	33	840	194	5.95324	6.7334
510771	438	0	30	1705	217	6.08222	7.44132
518437	488	0	30	1730	219	6.19032	7.45588
431956	350	0	21	1395	212	5.85793	7.24065
551916	315	0	21	1930	214	5.75257	7.56528
456770	300	1	19	800	194	5.70378	6.68461
	210	1	20	530	175	5.34711	6.27288
465108	490	0	33	1550	217	6.19441	7.34601
560181	230	0	35	820	193	5.43808	6.7093
456152	230	0	25	870	186	5.43808	6.76849
114620	365	0		1335	203	5.8999	7.19669
459305	270	0	19	985	196	5.59842	6.89264
160532	300	0	35	1020	208	5.70378	6.92756
479186	180	0	21	590	170	5.19296	6.38012
606338	235	1	21	890	210	5.45959	6.79122
479634	420	0	32	1250	207	6.04025	7.1309
535000	180	0	22	655	165	5.19296	6.48464
524906	428	0	23	1435	223	6.05912	7.26892
447020	350	0	18	900	216	5.85793	6.80239
438214	400	0	17	1770	210	5.99146	7.47873
486371	280	0	25	1090	194	5.63479	6.99393
449257	375	0	32	1205	201	5.92693	7.09423
501993	340	0	32	1355	206	5.82895	7.21156
479970	317	0	19	1240	208	5.7589	7.12287
540449	330	0	28	1695	213	5.79909	7.43544
332444	250	0	37	680	166	5.52146	6.52209
260081	314	0	38	1470	219	5.74939	7.29302
467989	480	0	22	1870	221	6.17379	7.53369
300982	308	0		1175	189	5.7301	7.06902
312344	450	0	33	1325	217	6.10925	7.18917
543757	210	1	24	1230	217	5.34711	7.11477
479731	360	0	28	1130	223	5.8861	7.02997
519315	254	0	31	575	170	5.53733	6.35437
530122	406	0	30	1315	214	6.00635	7.18159
506769	430	0	28	1415	210	6.06379	7.25488
298696	525	0	36	1900	217	6.2634	7.54961
465820	290	0	23	660	173	5.66988	6.49224
114696	300	0	20	880	186	5.70378	6.77992
121484	790	0	33	1710	210	6.67203	7.44425
567063	320	0	33	555	179	5.76832	6.31897
534474	230	0	34	795	182	5.43808	6.67834
437451	360	0	22	975	195	5.8861	6.88244
460926	725	0	34	1075	181	6.58617	6.98008
511916	245	0	31	815	200	5.50126	6.70319
453307	300	0	2	980	194	5.70378	6.88755
450401	290	0	25	835	182	5.66988	6.72743
71014	295	0	33	1545	210	5.68698	7.34278
543922	406	0	23	1420	204	6.00635	7.25841
539008	300	0	26	1340	213	5.70378	7.20042
422291	510	0	32	1540	217	6.23441	7.33954
448321	120	0		1125	209	4.78749	7.02554
310203	290	0	25	1145	189	5.66988	7.04316
534244	280	0	26	1270	202	5.63479	7.14677
475539	270	0		945	207	5.59842	6.85118
136792	246	0		550	168	5.50533	6.30992
485707	420	0	38	1465	223	6.04025	7.28961
510813	318	0	29	1375	201	5.76205	7.22621
436340	310	0	32	1180	199	5.73657	7.07327
570279	220	0		630	162	5.39363	6.44572
32400	312	0	25	1080	175	5.743	6.98472
449053	400	0		1780	222	5.99146	7.48437
422957	300	0	30	1035	193	5.70378	6.94216
208205	270	0	33	495	161	5.59842	6.20456
448792	340	0	27	1825	219	5.82895	7.50934
432305	340	0	29	1110	195	5.82895	7.01212
430746	350	0	24	1170	197	5.85793	7.06476
447046	275	0	30	1050	200	5.61677	6.95655
518803	174	0		340	157	5.15906	5.82895
434981	375	0		1215	195	5.92693	7.1025
474616	280	0	23	765	186	5.63479	6.63988
422688	400	0	17	1315	186	5.99146	7.18159
410987	375	0	33	1590	211	5.92693	7.37149
488036	310	0	21	1385	218	5.73657	7.23346
548751	370	0	25	1545	210	5.9135	7.34278
455242	190	0		650	173	5.24702	6.47697
385449	325	0	37	1800	223	5.78383	7.49554
492606	360	0	32	1425	216	5.8861	7.26193
529817	370	0	35	995	191	5.9135	6.90274
491720	400	0	19	1460	216	5.99146	7.28619
501236	320	0	24	1375	209	5.76832	7.22621
403146	143	1	34	335	166	4.96284	5.81413
475062	190	0	28	535	164	5.24702	6.28227
455669	200	0	29	635	184	5.29832	6.45362
442139	325	0	26	1380	206	5.78383	7.22984
336594	390	0	33	1208	204	5.96615	7.09672
511350	365	0	20	1395	202	5.8999	7.24065
485351	420	0	35	1485	199	6.04025	7.30317
272536	370	0	25	1485	214	5.9135	7.30317
	510	0	22	1680	221	6.23441	7.42655
151339	290	0		1115	186	5.66988	7.01661
464718	320	0	24	1850	224	5.76832	7.52294
484844	590	0	34	1370	219	6.38012	7.22257
442825	240	0	27	1200	210	5.48064	7.09008
534996	460	0	31	1485	214	6.13123	7.30317
575625	316	0		1125	214	5.75574	7.02554
460806	290	0	36	845	182	5.66988	6.73934
560548	396	0	33	1460	208	5.98141	7.28619
480835	250	0	28	740	168	5.52146	6.60665
559701	300	0	24	945	192	5.70378	6.85118
459789	360	0	36	1250	201	5.8861	7.1309
450521	500	0	24	1095	210	6.21461	6.99851
535563	442	0	25	1270	202	6.09131	7.14677
442179	325	0		1235	201	5.78383	7.11883
	280	0	26	700	183	5.63479	6.55108
531692	520	0	22	1850	220	6.25383	7.52294
429036	305	0	19	710	179	5.72031	6.56526
572133	250	1	34	490	168	5.52146	6.19441
428437	520	0	34	1900	223	6.25383	7.54961
551726	250	0	22	635	168	5.52146	6.45362
468822	240	0	28	710	175	5.48064	6.56526
495115	260	0	35	755	171	5.56068	6.62672
470422	480	0	37	1410	207	6.17379	7.25134
569958	244	0	19	675	169	5.49717	6.51471
532003	350	0	24	990	184	5.85793	6.8977
548701	530	0	30	1070	191	6.27288	6.97541
498120	510	0	25	1650	189	6.23441	7.40853
534847	196	0	40	515	189	5.27811	6.24417
230826	400	0	40	2005	222	5.99146	7.6034
498999	330	0	29	1100	199	5.79909	7.00307
555334	404	0	25	1885	223	6.00141	7.54168
171193	290	0	32	1106	210	5.66988	7.00851
434907	370	0		1175	200	5.9135	7.06902
437208	330	0	29	680	170	5.79909	6.52209
490005	310	0	23	1735	216	5.73657	7.45876
567669	320	0		1495	212	5.76832	7.30988
510003	390	0	17	1480	207	5.96615	7.2998
604867	370	0	21	1255	192	5.9135	7.13489
455821	300	0	21	845	192	5.70378	6.73934
530462	378	0	24	1195	206	5.93489	7.0859
441238	360	0	17	790	181	5.8861	6.67203
473046	280	0	20	1315	208	5.63479	7.18159
557057	190	1	29	500	195	5.24702	6.21461
505405	230	0	30	560	161	5.43808	6.32794
	238	0	30	720	174	5.47227	6.57925
470444	310	0	26	975	189	5.73657	6.88244
498803	330	0	30	900	179	5.79909	6.80239
522277	100	0	31	620	170	4.60517	6.42972
455503	340	0	32	800	170	5.82895	6.68461
501388	350	0	25	1585	224	5.85793	7.36834
564847	405	0	18	1670	221	6.00389	7.42058
487990	250	0	35	845	193	5.52146	6.73934
452121	540	0	59	660	185	6.29157	6.49224
522457	330	0	36	1420	194	5.79909	7.25841
563321	280	0	36	945	182	5.63479	6.85118
407968	240	0	22	685	185	5.48064	6.52942
22625	530	0	37	1730	206	6.27288	7.45588
405132	322	0	29	1010	182	5.77455	6.91771
510799	430	0		1195	203	6.06379	7.0859
505943	425	0	30	1495	210	6.05209	7.30988
508440	240	0	33	970	194	5.48064	6.8773
465477	450	0	26	1035	187	6.10925	6.94216
470706	350	0	19	1005	186	5.85793	6.91274
420340	280	0	26	1065	204	5.63479	6.97073
503629	120	0	25	360	160	4.78749	5.8861
455454	260	0	18	935	175	5.56068	6.84055
501311	290	0	17	1215	195	5.66988	7.1025
470727	290	0	28	740	172	5.66988	6.60665
483529	390	0	19	1370	206	5.96615	7.22257
495428	390	0	27	1290	204	5.96615	7.1624
416818	200	0		590	169	5.29832	6.38012
540692	240	0	33	990	199	5.48064	6.8977
554601	358	0	25	1625	208	5.88053	7.39326
548766	340	0	35	1025	191	5.82895	6.93245
508502	380	0	35	1375	203	5.94017	7.22621
378454	296	0	30	1250	222	5.69036	7.1309
540682	390	0		1895	203	5.96615	7.54697
337701	300	0	25	1095	189	5.70378	6.99851
481296	340	0	44	1030	196	5.82895	6.93731
519061	186	1	28	540	202	5.22575	6.29157
438008	360	0	35	1040	182	5.8861	6.94698
568709	328	0	28	1530	221	5.79301	7.33302
426920	420	0	20	1625	222	6.04025	7.39326
459801	250	0	23	685	168	5.52146	6.52942
528814	460	0	26	715	191	6.13123	6.57228
479110	390	0	29	850	176	5.96615	6.74524
530448	550	0	32	2015	218	6.30992	7.60837
600205	215	0	29	925	191	5.37064	6.82979
238932	210	1		1025	196	5.34711	6.93245
419220	400	0	36	1665	221	5.99146	7.41758
491724	175	1	29	870	222	5.16479	6.76849
176565	300	0		830	182	5.70378	6.72143
540170	302	0	35	1365	206	5.71043	7.21891
479603	280	0	30	765	189	5.63479	6.63988
540547	208	0	39	1065	197	5.33754	6.97073
544231	290	0	25	1075	191	5.66988	6.98008
503628	230	0	33	675	168	5.43808	6.51471
491709	320	0	31	1495	211	5.76832	7.30988
561262	220	0	20	590	167	5.39363	6.38012
488413	340	0	28	1275	196	5.82895	7.1507
504801	380	0	20	1320	215	5.94017	7.18539
464238	240	0	34	1260	201	5.48064	7.13887
527213	392	0	26	1135	191	5.97126	7.03439
492459	250	0	23	825	168	5.52146	6.71538
502015	410	0	16	1665	221	6.01616	7.41758
485878	230	1	33	975	213	5.43808	6.88244
497057	330	0	23	1430	209	5.79909	7.26543
465344	175	1	25	830	205	5.16479	6.72143
570275	345	0	31	1140	202	5.84354	7.03878
455168	380	0		1125	188	5.94017	7.02554
321510	250	0	27	810	179	5.52146	6.69703
484509	250	0	20	820	194	5.52146	6.7093
488542	390	0		955	189	5.96615	6.86171
480845	350	0	27	1725	219	5.85793	7.45298
511294	200	0	22	835	180	5.29832	6.72743
470917	340	0	17	850	170	5.82895	6.74524
601630	245	0	19	725	190	5.50126	6.58617
543951	402	0		1470	210	5.99645	7.29302
563900	485	0	32	1755	220	6.18415	7.47022
481579	450	0	39	1800	222	6.10925	7.49554
505688	260	0	31	615	166	5.56068	6.42162
370684	208	0	27	675	156	5.33754	6.51471
558617	426	0	18	1655	205	6.05444	7.41156
530569	200	0	29	745	179	5.29832	6.61338
530788	372	0	34	1365	203	5.91889	7.21891
530314	360	0	22	1115	203	5.8861	7.01661
477559	220	1	28	845	197	5.39363	6.73934
	234	0	25	620	169	5.45532	6.42972
308018	260	0	33	795	187	5.56068	6.67834
539010	262	0		885	164	5.56834	6.78559
564911	375	0	24	980	189	5.92693	6.88755
559986	410	0	35	1810	175	6.01616	7.50108
363541	270	0	32	900	188	5.59842	6.80239
441622	375	1	19	1015	203	5.92693	6.92264
515240	300	0	22	1165	188	5.70378	7.06048
86834	320	0	18	1120	193	5.76832	7.02108
323922	350	0	25	1335	198	5.85793	7.19669
142209	290	0	20	985	203	5.66988	6.89264
346734	310	1	29	775	211	5.73657	6.65286
513438	180	0	33	965	187	5.19296	6.87213
560484	330	0	31	1140	193	5.79909	7.03878
602543	154	0	38	480	169	5.03695	6.17379
196919	430	0	33	1660	213	6.06379	7.41457
510860	260	0	18	790	179	5.56068	6.67203
343858	150	1	19	700	192	5.01064	6.55108
535540	227	0	33	815	179	5.42495	6.70319
111039	320	0		545	175	5.76832	6.30079
496313	350	0	36	1385	216	5.85793	7.23346
474626	660	0	26	1570	211	6.49224	7.35883
207089	390	0		1460	203	5.96615	7.28619
495175	600	0	30	1475	205	6.39693	7.29641
548777	248	0	31	780	175	5.51343	6.65929
402524	520	0		1620	217	6.25383	7.39018
